# Supplementary material for: Self-folding nanostructures with imprint patterned surfaces (SNIPS)
Source: Royal Society of Chemistry journal article supplement (doi:10.1039/c6fd00021e), 2016-01-01
Supplement: c6fd00021e1.pdf [file c6fd00021e1.pdf]

## Supporting Information

### Self-folding Nanostructures with Imprint Patterned Surfaces (SNIPS)

Hye Rin Kwag<sup>a</sup>, Jeong-Hyun Cho<sup>a</sup>, Si-Young Park<sup>a</sup>, Jaehyun Park<sup>a</sup>, and David H. Gracias<sup>a, b</sup>

<sup>a</sup> Department of Chemical and Biomolecular Engineering, Johns Hopkins University, Baltimore, MD 21218, USA

<sup>b</sup> Department of Materials Science and Engineering, Johns Hopkins University, Baltimore, MD 21218, USA

#### Note S1: Details of the NIL stamps and methods

##### a. Details of master stamps used for NIL

Silicon master stamps (LightSmyth Technologies, Inc.) used for each figures are summarized in the table below.

| Figure     | Shape  | Lattice type            | Period (nm) | Width (nm) | Part number              |
|------------|--------|-------------------------|-------------|------------|--------------------------|
| 2b, 3b     | circle | Rectangular (rect) post | 600         | 275        | S2D-18B2-0808-350-P      |
| 2c, 3c     | line   | N/A                     | 500         | 300        | SNS-C20-0808-350-D60-P   |
| 2c, 3c     | circle | rect post               | 500         | 135        | S2D-24B1-0808-350-P      |
| 2d, 3d     | line   | N/A                     | 600         | 260        | SNS-C16.7-0808-350-D45-P |
| 2d, 3d     | circle | rect post               | 600         | 275        | S2D-18B2-0808-350-P      |
| 2e-h, 4b-d | circle | hex hole                | 600         | 180        | S2D-24D2-0808-350-P      |
| 4a         | circle | hex post                | 600         | 165        | S2D-24C2-0808-350-P      |

**Table S1.** Details of master stamps used for NIL. The dimensions listed are per vendor specifications.

##### b. NIL stamp cleaning and preparation process

All stamps were first O<sub>2</sub> plasma cleaned and silanized with trichloro (1H,1H,2H,2H-perfluorooctyl) silane (Sigma Aldrich) by vapor phase deposition at 140 °C before use. Stamps were silanized again when the resist started to stick onto its surface.

##### c. Details of the home-built NIL instrumentation

Commercial NIL tools are not readily accessible. Even a desktop NIL tool for everyday lab use costs few tens of thousand dollars. Hence, we also investigated the use of the creation of a bench-top, home-built NIL system (**Figure S1**). In this system, we utilized small weights and a commercial heat press (which costs less than \$500) integrated with hotplates. All experiments using this system were done in ambient air which could cause air bubbles to get trapped in the film during the NIL process. One way to reduce the air bubbles was to carry out the NIL in a vacuum glove box. However, we found

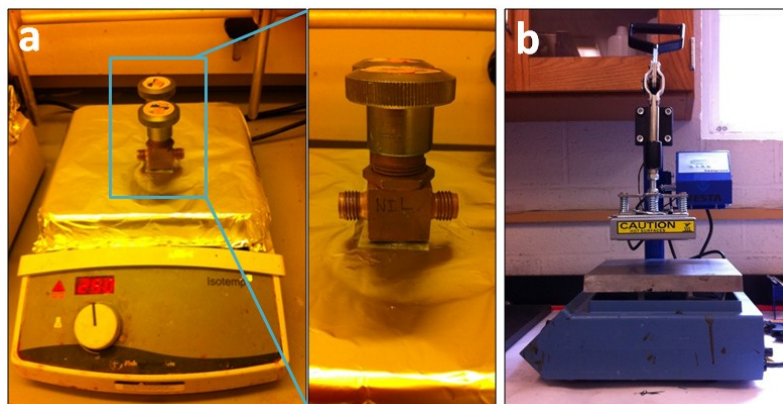

**Figure S1.** Photographs of two bench-top home-built NIL systems including, (a) a NIL procedure utilizing small weights (~150 g) and a hot plate in ambient air, and (b) a high pressure home-built system using a commercial heat press and hotplate.

that even with bubbles, a large number of nanofeatures could be patterned for laboratory use. When using the heat press, a cushion (such as PDMS films) had to be placed between the sample and hotplate surface or the silicon master mold and top plate of the heat press to prevent damage to the sample and the mold.

Using small weights and the high pressure heat press, we were able to pattern SU-8 and polycaprolactone (PCL) respectively as shown in **Figure S2**. Capillary force lithography (CFL) is a patterning method which utilizes capillary rise of a liquid-like molten polymer into spaces between patterns on an elastomeric mold such as a polydimethylsiloxane (PDMS).<sup>1</sup> Here, we casted PDMS (elastomer base to curing agent ratio 10:1) onto the Si master stamp with nanopatterns and cured at 90 °C for 3 hours. The PDMS negative replica of the master stamp was then detached from the master stamp and was cut into a small piece. We then placed the PDMS stamp onto a PMMA A2 (MW 950K, MicroChem Corp.) coated Si wafer on a hotplate at 300 °C for 2 hours. A small weight of ~150 g was put on top of the PDMS to aid in conformal contact between the replica stamp and PMMA. After cooling the sample down to room temperature, the PDMS was peeled from the sample resulting in nanopatterned PMMA. Here, we have shown that various polymeric materials can be patterned using simple systems such as small weights, commercial heat press and PDMS replica stamps without the need to using expensive imprint tools.

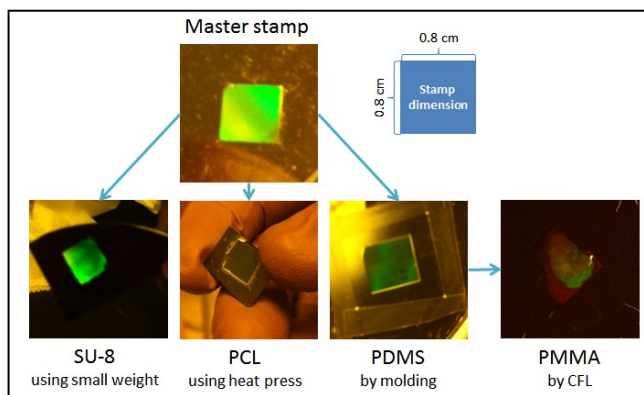

**Figure S2.** NIL realized using a variety of methods and materials.

**Note S2: Evidence for tighter tubular SNIPS formed with thinner films.**

We observed a tighter and more uniform tubes formed when tubular Al<sub>2</sub>O<sub>3</sub> / Sn SNIPS with Au patterns have thinner Al<sub>2</sub>O<sub>3</sub>. These SNIPS are composed of 3 nm Al<sub>2</sub>O<sub>3</sub> whereas in Fig. 2d and Fig. 3d, SNIPS are composed of 6 nm Al<sub>2</sub>O<sub>3</sub> with other parameters kept same. We rationalize this observation by noting that since the underlying Al<sub>2</sub>O<sub>3</sub> layer is thinner, its bending rigidity is significantly lower causing enhanced curvature.

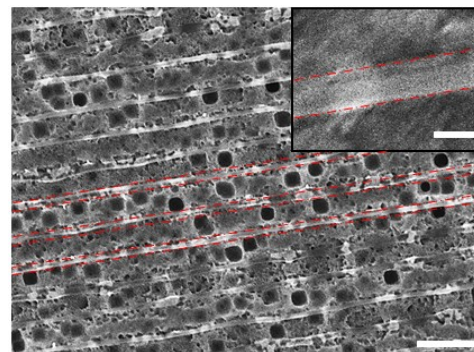

**Figure S3.** Tubular Al<sub>2</sub>O<sub>3</sub> (3 nm)/ Sn (5 nm) SNIPS with Au patterns. Scale bars are 1 μm for the main image and 100 nm for the inset.

**Supporting information Reference**

1. K. Y. Suh, Y. S. Kim and H. H. Lee, *Advanced Materials*, 2001, **13**, 1386-1389.
